# Supplementary material
Source: PubMed Central journal article supplement (PMC5831444)

## Supplementary Online Content

Cerullo M, Chen SY, Dillhoff M, Schmidt C, Canner JK, Pawlik TM. Association of hospital market concentration with costs of complex hepatopancreaticobiliary surgery. *JAMA Surg*. Published online July 26, 2017.  
doi:10.1001/jamasurg.2017.2158

**eFigure 1.** Unadjusted Mean Costs for Pancreatic Resection and Hepatic Resection by HHI, Clustered by Hospital, With SEs

**eFigure 2.** Unadjusted Mean Charges for Pancreatic Resection and Hepatic Resection by HHI, Clustered by Hospital, With SEs

This supplementary material has been provided by the authors to give readers additional information about their work.

**eFigure 1. Unadjusted Mean Costs for Pancreatic Resection and Hepatic Resection by HHI, Clustered by Hospital, With SEs**

**A. Pancreatic Resection**

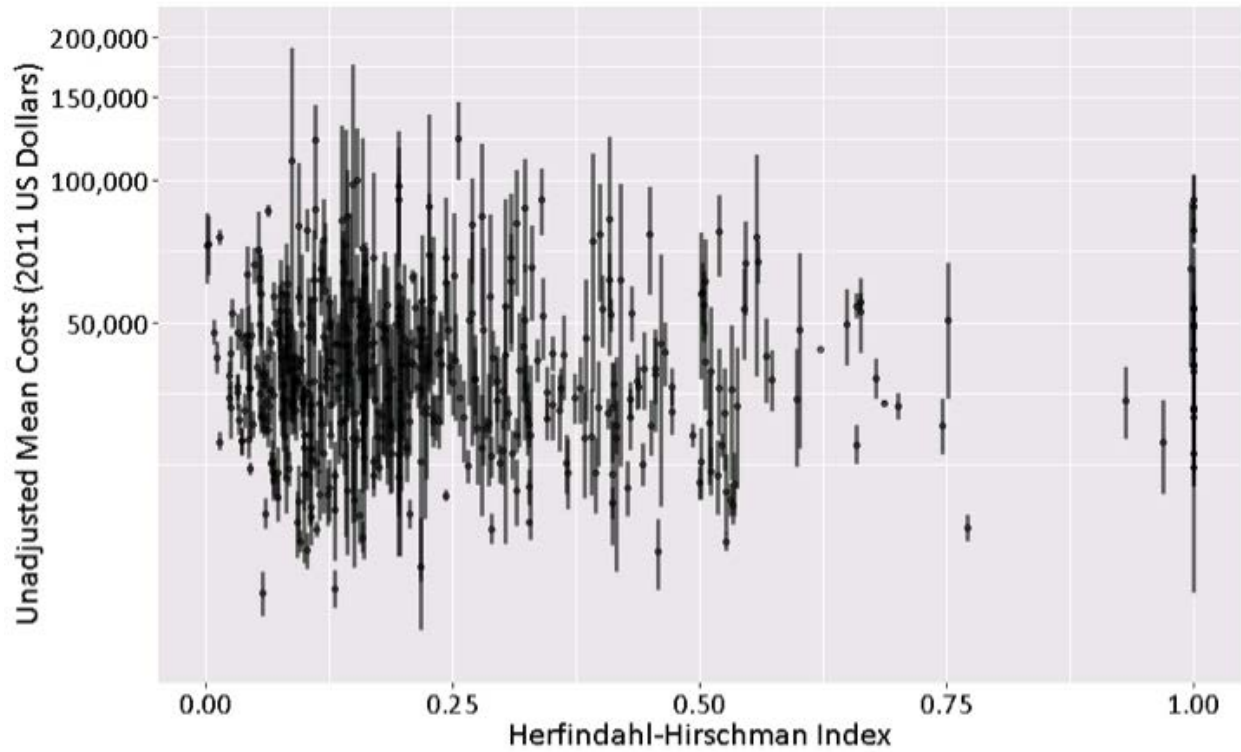

**B. Hepatic Resection**

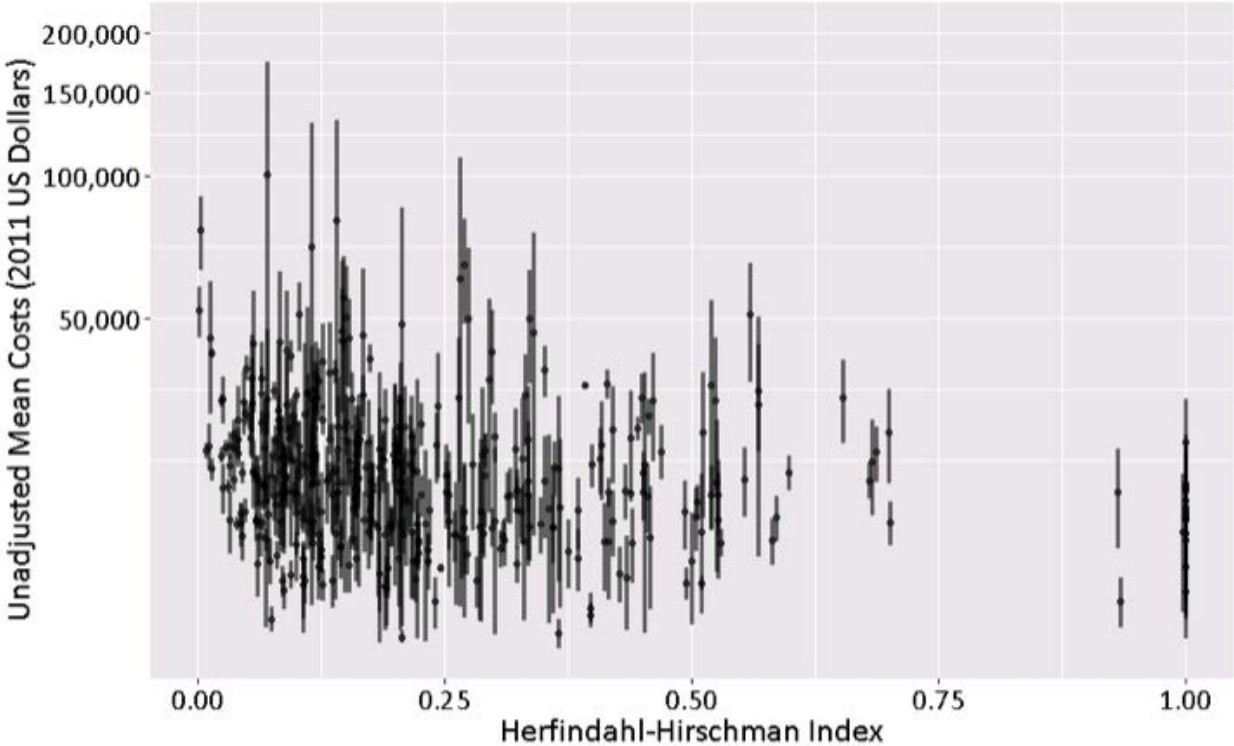

**eFigure 2. Unadjusted Mean Charges for Pancreatic Resection and Hepatic Resection by HHI, Clustered by Hospital, With SEs**

**A. Pancreatic Resection**

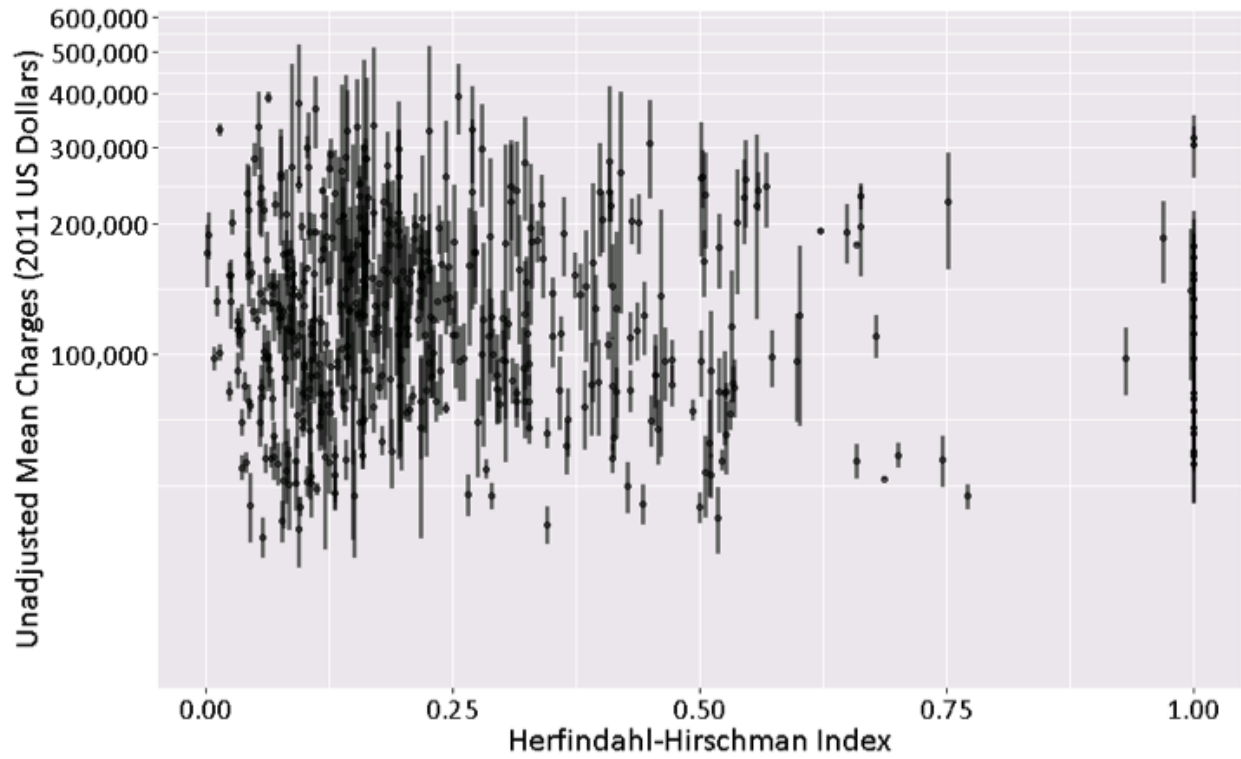

## B. Hepatic Resection

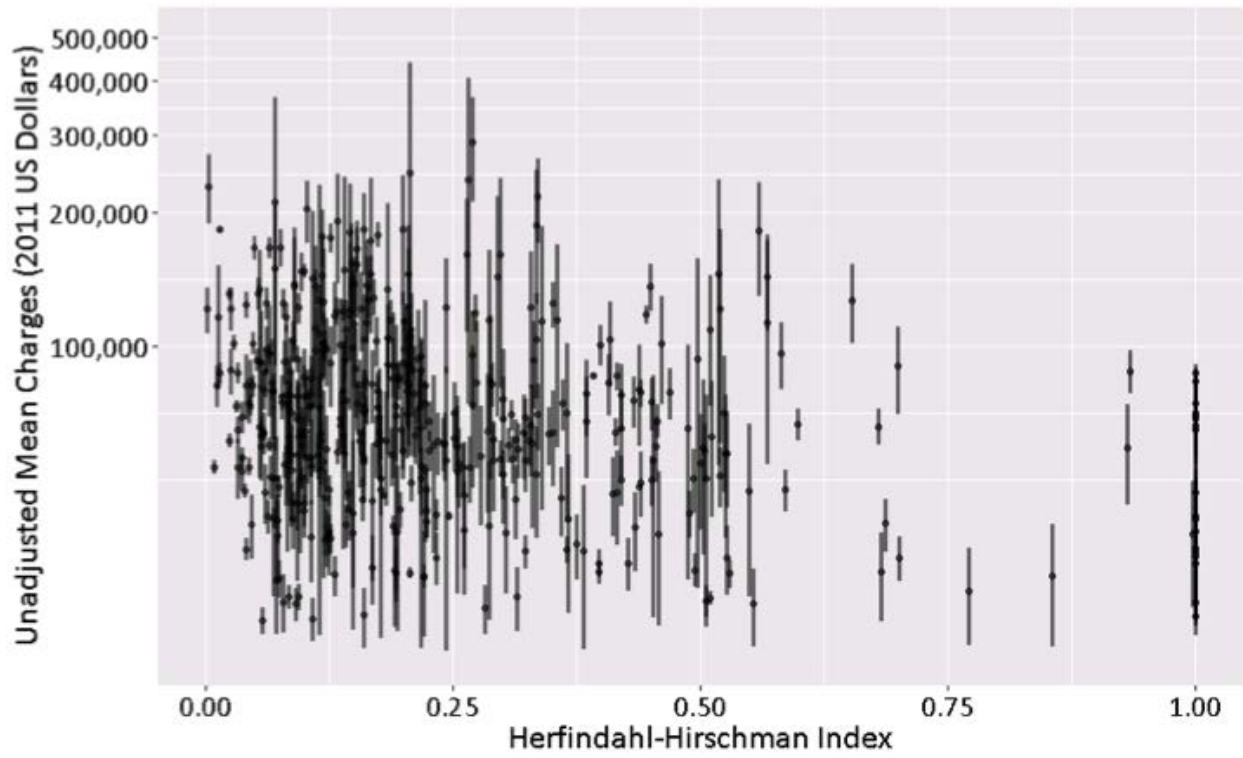

Supplement: jamasurg-152-1128-s001.pdf [file jamasurg-152-1128-s001.pdf]
